# Supplementary figures and images for: Predicting the Angiotensin Converting Enzyme 2 (ACE2) Utilizing Capability as the Receptor of SARS-CoV-2
Source: Preprints.org preprint supplement (doi:10.20944/preprints202003.0091.v1), 2020-03-05

- Teleostomi
- Chondrichthyes
- Amphibian
- Reptilia
- Aves
- Mammalia

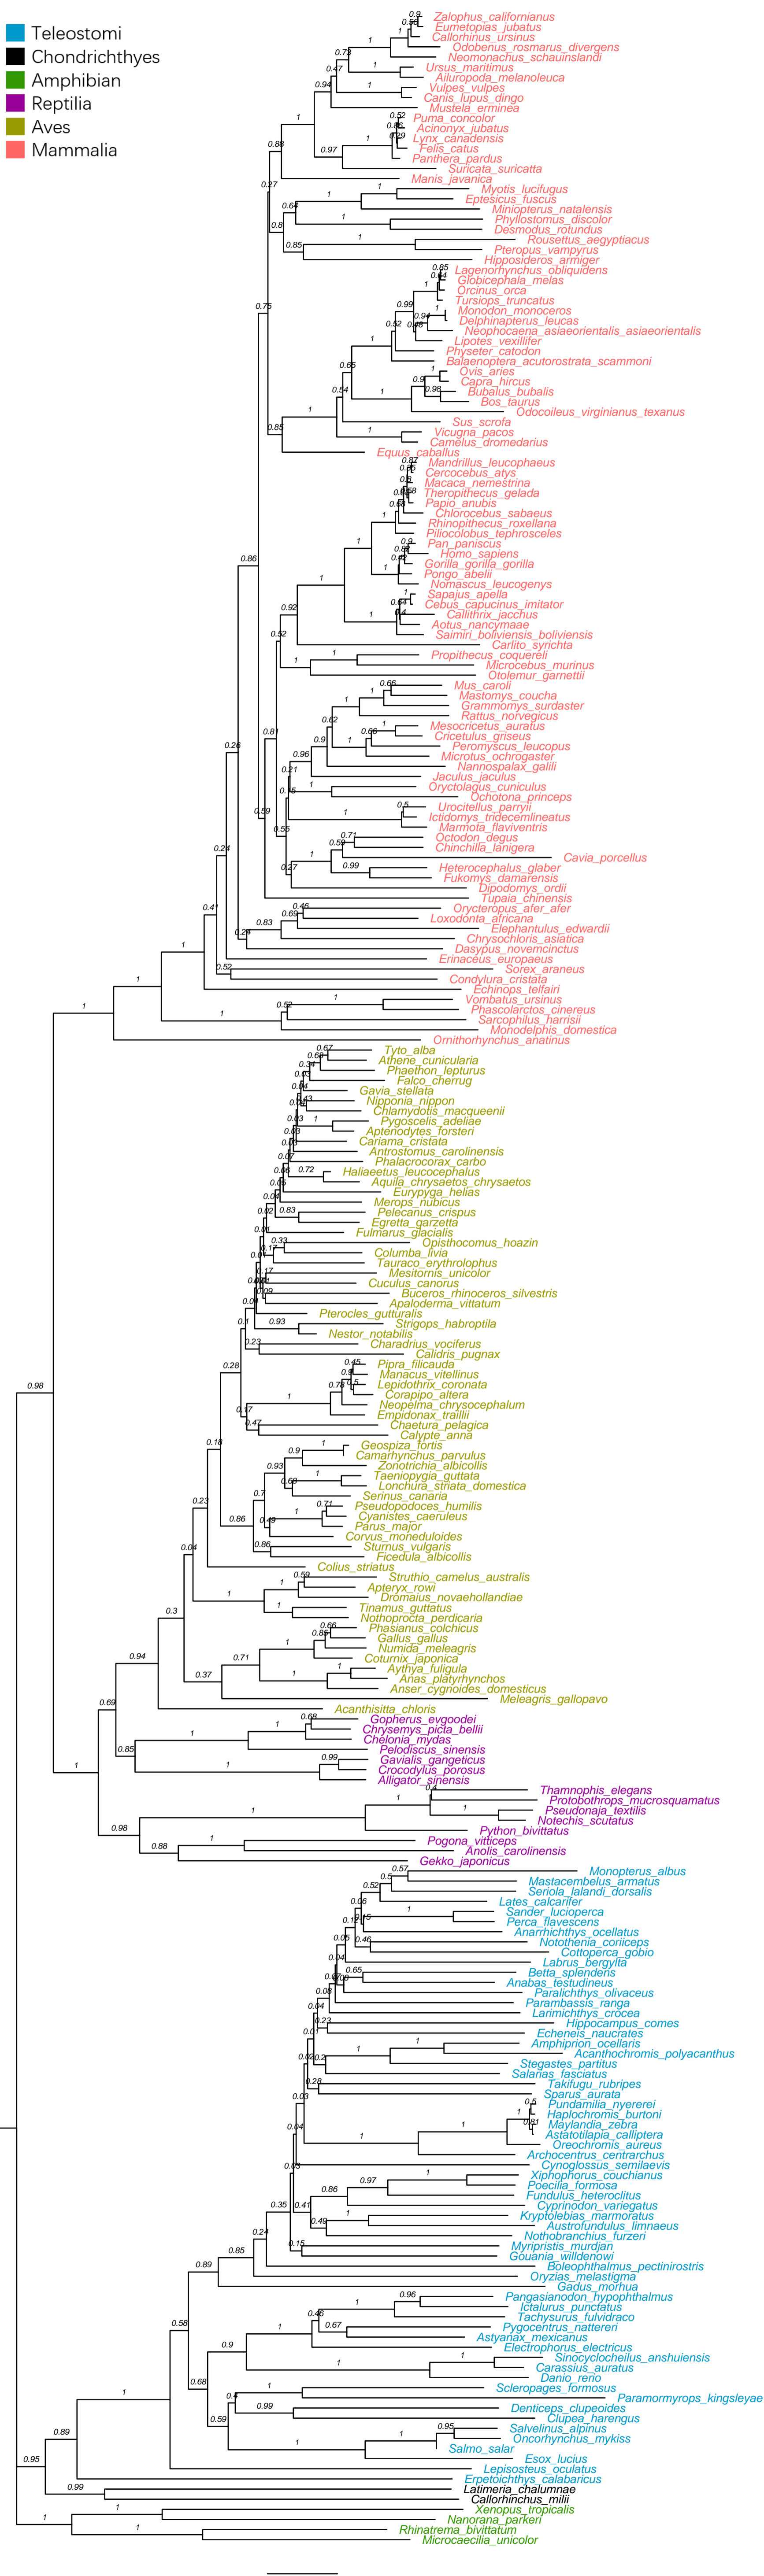

Supplement: Supplementary file 1 [file All%20species%20AEC2%20NJ%20Tree.pdf]
